# Supplementary material for: Well-defined triblock copolymers of polyethylene with polycaprolactone or polystyrene using a novel difunctional polyhomologation initiator
Source: Royal Society of Chemistry journal article supplement (doi:10.1039/c7py01079f), 2017-01-01
Supplement: c7py01079f1.pdf [file c7py01079f1.pdf]

## Well-defined triblock copolymers of polyethylene with polycaprolactone or polystyrene using a novel difunctional polyhomologation initiator

Reem A. Alshumrani and Nikos Hadjichristidis\*

*King Abdullah University of Science and Technology (KAUST), Physical Sciences and Engineering Division, KAUST Catalysis Center, Polymer Synthesis Laboratory, Thuwal 23955, Kingdom of Saudi Arabia*

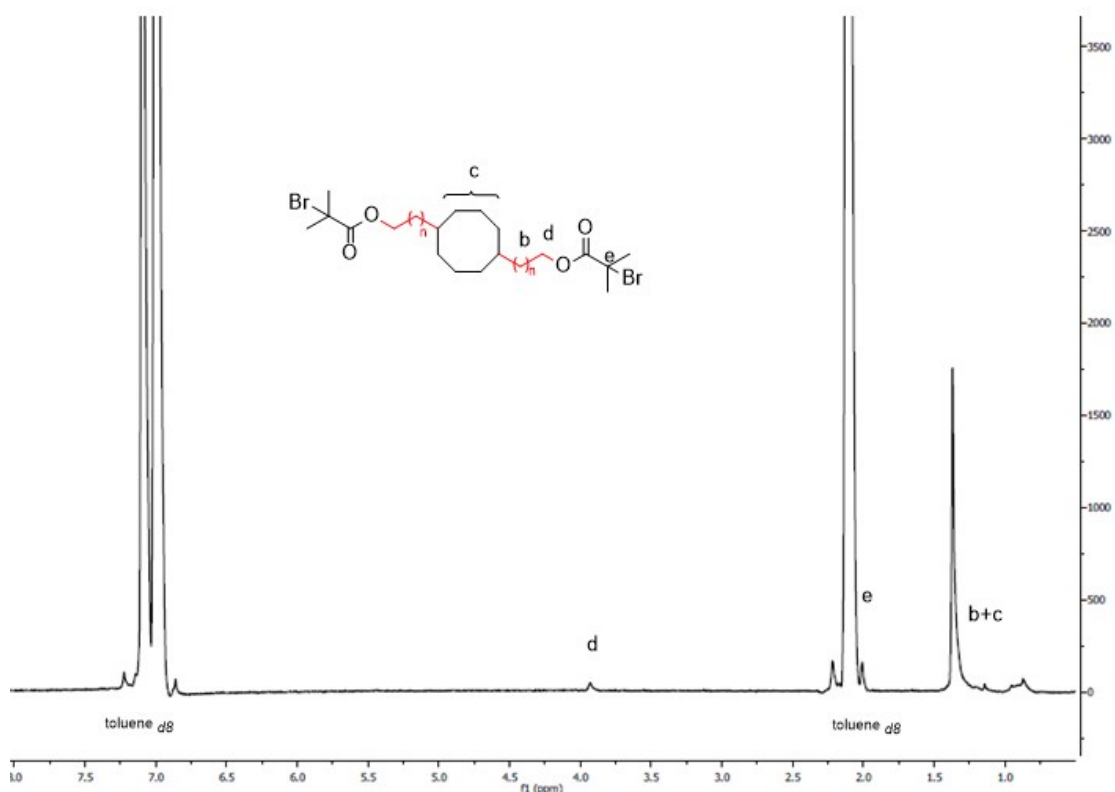

Figure S1. <sup>1</sup>H NMR spectrum of α,ω-dibromo polyethylene
